# Supplementary material for: WO3 nanowires on carbon papers: electronic transport, improved ultraviolet-light photodetectors and excellent field emitters
Source: Royal Society of Chemistry journal article supplement (doi:10.1039/c0jm04557h), 2011-01-01
Supplement: c0jm04557h.pdf [file c0jm04557h.pdf]

## Supporting Information

### WO<sub>3</sub> nanowires on carbon papers: electronic transport, improved ultraviolet-light photodetectors and excellent field-emitters

Liang Li, Yong Zhang, Xiaosheng Fang, Tianyou Zhai, Meiyong Liao, Xueliang Sun, Yasuo Koide, Yoshio Bando and Dmitri Golberg

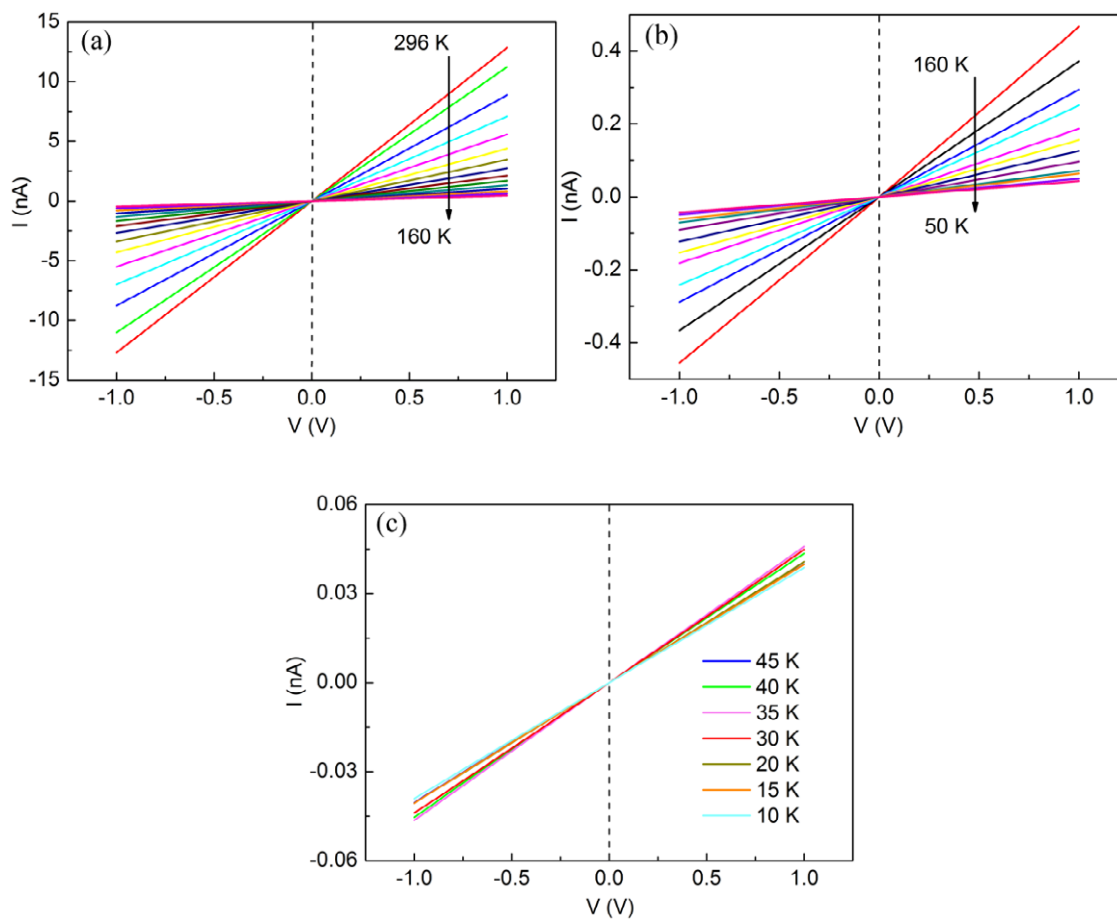

**Fig. S1** *I-V* characteristics of WO<sub>3</sub> nanowires in the temperature range of a) 160-290 K, b) 50-160 K, and c) 10-45 K.

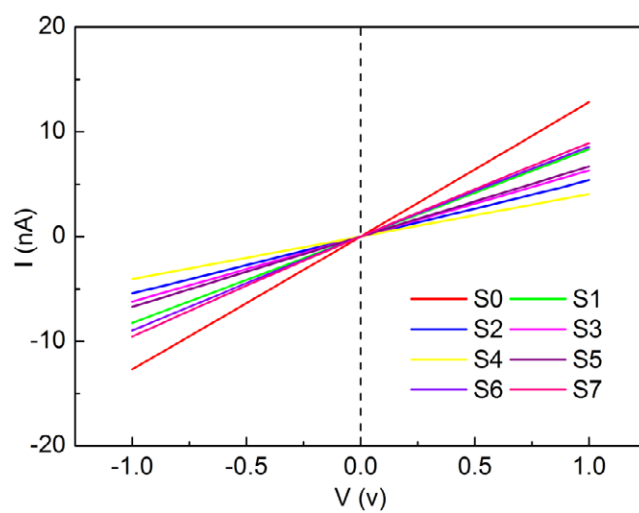

**Fig. S2**  $I$ - $V$  curves measured from eight devices labeled from S0 to S7 indicated in Figure S3.

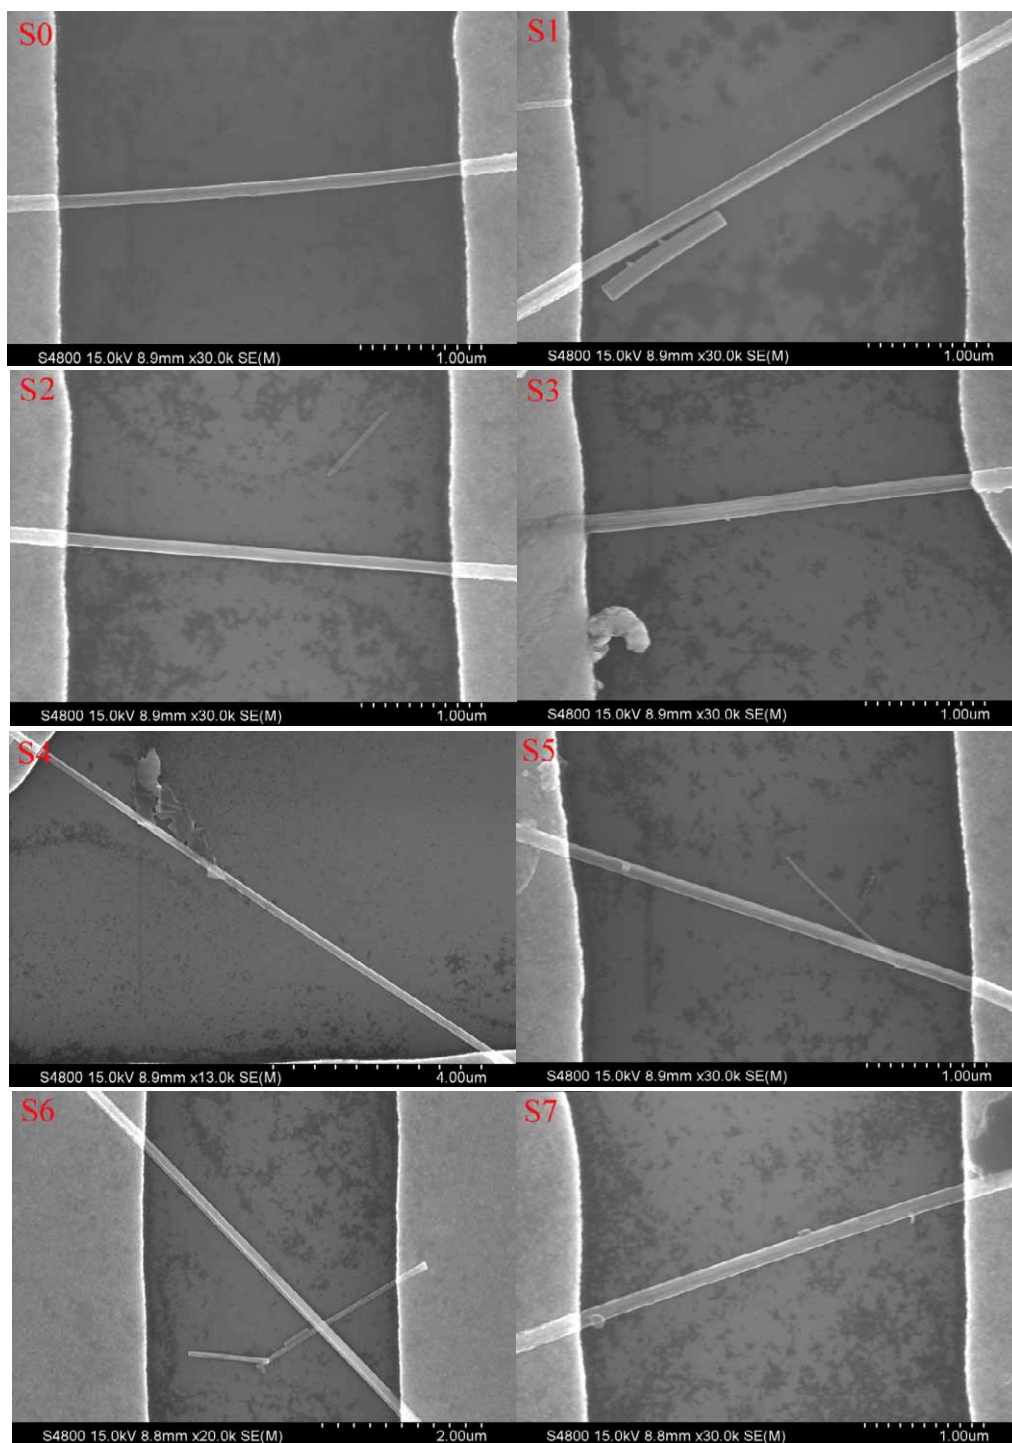

**Fig. S3** SEM images of individual  $\text{WO}_3$  nanowire photodetectors labeled with S0-S7, respectively.

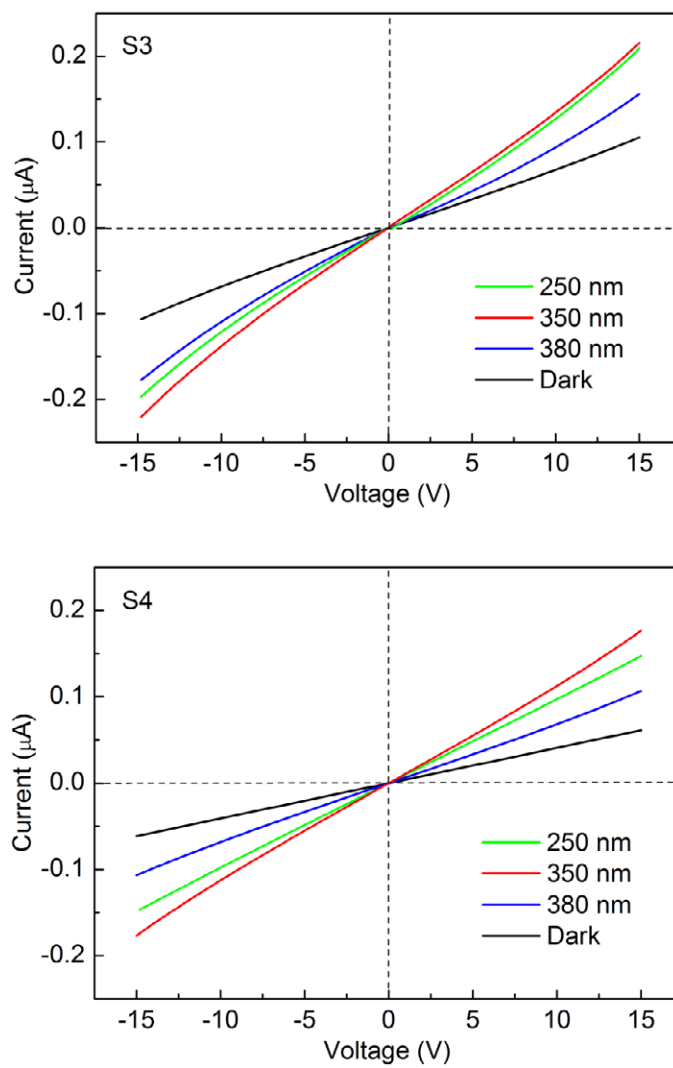

**Fig. S4**  $I$ - $V$  curves measured on the devices S3 and S4 under dark condition and light with various wavelengths.
